# Supplementary material
Source: PubMed Central journal article supplement (PMC5705438)
Supplement: NIHMS912728-supplement-supplement_1.pdf [file NIHMS912728-supplement-supplement_1.pdf]

## **Supplementary Material**

Trajectories of maternal leisure time physical activity and sedentary behavior during adolescence to young adulthood and offspring birthweight

Badon SE, Littman AJ, Chan KCG, Williams MA, Enquobahrie DA

Table 1. Characteristics of eligible participants and analytic sample

Table 2. Final forms for trajectory groups

Table 3. Mean leisure time physical activity at each study visit by trajectory groups

Table 4. Mean leisure time sedentary time at each study visit by trajectory groups

Table 5. Associations of leisure time physical activity and sedentary behavior trajectory groups with birthweight

Table 6. Associations of leisure time physical activity and sedentary behavior trajectory groups with categories of birthweight

Table 7. GEE sensitivity analysis for associations of leisure time physical activity and sedentary behavior with birthweight

Table 8. Associations of leisure time sedentary behavior trajectory groups with categorical birthweight

Table 1. Characteristics of eligible participants and analytic sample

|                                                         | <b>All Eligible<br/>(N=2801)</b> |             | <b>Analytic<br/>Sample<br/>(N=1408)</b> | <b>Excluded<br/>(N=1393)</b> |             |
|---------------------------------------------------------|----------------------------------|-------------|-----------------------------------------|------------------------------|-------------|
| <i>Maternal characteristics</i>                         | <b>N</b>                         |             |                                         | <b>N</b>                     |             |
| Age (years), weighted mean (SE)                         | 2800                             | 25 (0.1)    | 24 (0.2)                                | 1391                         | 25 (0.2)    |
| Race, n (weighted %)                                    | 2793                             |             |                                         | 1384                         |             |
| Non-Hispanic white                                      | 1505                             | 65          | 813 (67)                                | 692                          | 63          |
| Non-Hispanic black                                      | 604                              | 16          | 274 (14)                                | 330                          | 18          |
| Hispanic                                                | 438                              | 11          | 213 (11)                                | 224                          | 11          |
| Other                                                   | 246                              | 7           | 108 (7)                                 | 138                          | 7           |
| Married at time of pregnancy, (n, weighted %)           | 1846                             | 1545 (84)   | 770 (81) <sup>a</sup>                   | 909                          | 775 (88)    |
| Nulliparous, n (weighted %)                             | 2801                             | 1572 (56)   | 813 (56)                                | 1392                         | 759 (56)    |
| Smoking during pregnancy, n (weighted %)                | 2796                             | 512 (21)    | 284 (24)                                | 1387                         | 227 (19)    |
| Alcohol use during pregnancy, n (weighted %)            | 2798                             | 146 (6)     | 86 (7)                                  | 1389                         | 60 (4)      |
| <i>Offspring characteristics</i>                        |                                  |             |                                         |                              |             |
| Birthweight (grams), weighted mean (SE)                 | 2778                             | 3288 (17.6) | 3281 (23.0)                             | 1369                         | 3295 (23.9) |
| Gestational age at delivery (weeks), weighted mean (SE) | 2783                             | 39 (0.1)    | 39 (0.1)                                | 1374                         | 39 (0.1)    |
| Male, n (weighted %)                                    | 2801                             | 1459 (52)   | 717 (52)                                | 1392                         | 741 (52)    |

<sup>a</sup>N=937

Table 2. Finals forms for trajectory groups

---

| <b>Trajectory groups</b>                   | <b>Form of trajectories</b> |
|--------------------------------------------|-----------------------------|
| <i>Leisure time physical activity</i>      |                             |
| Overall                                    | All cubic                   |
| Normal weight                              | All quadratic               |
| Overweight/obese                           | All cubic                   |
| <br><i>Leisure time sedentary behavior</i> |                             |
| Overall                                    | All cubic                   |
| Normal weight                              | All quadratic               |
| Overweight/obese                           | All quadratic               |

---

Table 3. Mean leisure time physical activity at each study visit by trajectory groups

| Trajectory group                   | N   | Mean leisure time physical activity (frequency/week) |                      |                       |
|------------------------------------|-----|------------------------------------------------------|----------------------|-----------------------|
|                                    |     | Wave I <sup>a</sup>                                  | Wave II <sup>b</sup> | Wave III <sup>c</sup> |
| <i>Overall</i>                     |     |                                                      |                      |                       |
| 1 (decreasing from low activity)   | 940 | 2.5                                                  | 2.3                  | 1.4                   |
| 2 (decreasing from high activity)  | 391 | 4.8                                                  | 4.8                  | 3.1                   |
| 3 (increasing activity)            | 77  | 4.3                                                  | 4.2                  | 8.7                   |
| <i>Female offspring</i>            |     |                                                      |                      |                       |
| 1 (decreasing from low activity)   | 468 | 2.5                                                  | 2.4                  | 1.5                   |
| 2 (decreasing from high activity)  | 181 | 4.7                                                  | 4.7                  | 3.0                   |
| 3 (increasing activity)            | 42  | 4.5                                                  | 4.2                  | 8.8                   |
| <i>Male offspring</i>              |     |                                                      |                      |                       |
| 1 (decreasing from low activity)   | 472 | 2.5                                                  | 2.2                  | 1.4                   |
| 2 (decreasing from high activity)  | 210 | 4.8                                                  | 4.8                  | 3.2                   |
| 3 (increasing activity)            | 35  | 3.9                                                  | 4.1                  | 8.5                   |
| <i>Normal Weight</i>               |     |                                                      |                      |                       |
| 1 (consistently moderate activity) | 41  | 2.2                                                  | 2.4                  | 6.0                   |
| 2 (decreasing from low activity)   | 359 | 2.1                                                  | 2.1                  | 1.1                   |
| 3 (decreasing from high activity)  | 220 | 4.7                                                  | 4.4                  | 2.4                   |
| 4 (increasing from high activity)  | 42  | 5.0                                                  | 5.5                  | 7.1                   |
| <i>Overweight/obese</i>            |     |                                                      |                      |                       |
| 1 (consistently low activity)      | 461 | 2.5                                                  | 2.3                  | 1.6                   |
| 2 (decreasing activity)            | 193 | 4.9                                                  | 4.9                  | 2.9                   |
| 3 (increasing activity)            | 41  | 4.1                                                  | 4.0                  | 9.4                   |

<sup>a</sup>Wave I data collection occurred 1994-1995 when participants were in grade 7-12 (age 11-21 years).

<sup>b</sup>Wave II data collection occurred in 1996 when participants were age 12-22 years.

<sup>c</sup>Wave III data collection occurred 2001-2002 when participants were age 18-26 years.

Table 4. Mean leisure time sedentary behavior at each study visit by trajectory groups

|                                 | N    | Mean leisure time sedentary behavior (hours/week) |         |          |
|---------------------------------|------|---------------------------------------------------|---------|----------|
|                                 |      | Wave I                                            | Wave II | Wave III |
| <i>Overall</i>                  |      |                                                   |         |          |
| 1 (consistently moderate SB)    | 88   | 41.2                                              | 24.4    | 41.6     |
| 2 (consistently low SB)         | 1085 | 14.6                                              | 12.9    | 15.3     |
| 3 (decreasing from moderate SB) | 175  | 39.1                                              | 40.2    | 23.6     |
| 4 (increasing SB)               | 33   | 28.7                                              | 31.2    | 80.4     |
| 5 (decreasing from high SB)     | 27   | 74.1                                              | 73.2    | 37.1     |
| <i>Female offspring</i>         |      |                                                   |         |          |
| 1 (consistently moderate SB)    | 42   | 38.8                                              | 24.3    | 41.5     |
| 2 (consistently low SB)         | 525  | 14.5                                              | 12.8    | 15.8     |
| 3 (decreasing from moderate SB) | 90   | 41.1                                              | 39.4    | 23.5     |
| 4 (increasing SB)               | 16   | 21.9                                              | 34.2    | 73.9     |
| 5 (decreasing from high SB)     | 13   | 77.1                                              | 72.7    | 36.4     |
| <i>Male offspring</i>           |      |                                                   |         |          |
| 1 (consistently moderate SB)    | 46   | 43.5                                              | 24.4    | 41.8     |
| 2 (consistently low SB)         | 556  | 14.8                                              | 12.9    | 14.9     |
| 3 (decreasing from moderate SB) | 84   | 37.0                                              | 41.1    | 23.7     |
| 4 (increasing SB)               | 16   | 35.4                                              | 28.3    | 87.2     |
| 5 (decreasing from high SB)     | 11   | 70.6                                              | 73.7    | 37.8     |
| <i>Normal Weight</i>            |      |                                                   |         |          |
| 1 (consistently low SB)         | 604  | 15.8                                              | 14.3    | 15.9     |
| 2 (decreasing SB)               | 58   | 51.6                                              | 41.9    | 39.6     |
| <i>Overweight/obese</i>         |      |                                                   |         |          |
| 1 (increasing SB)               | 29   | 33.4                                              | 30.3    | 78.6     |
| 2 (consistently low SB)         | 600  | 18.0                                              | 16.0    | 18.6     |
| 3 (decreasing SB)               | 66   | 60.2                                              | 56.1    | 26.2     |

Abbreviations: sedentary behavior, SB

<sup>a</sup>Wave I data collection occurred 1994-1995 when participants were in grade 7-12 (age 11-21 years).

<sup>b</sup>Wave II data collection occurred in 1996 when participants were age 12-22 years.

<sup>c</sup>Wave III data collection occurred 2001-2002 when participants were age 18-26 years.

Table 5. Associations of leisure time physical activity and sedentary behavior trajectory groups with birthweight

|                                        | Wald test P value <sup>a</sup> |               |                             |                   |                  |
|----------------------------------------|--------------------------------|---------------|-----------------------------|-------------------|------------------|
|                                        | Total Population               | Offspring Sex |                             | Pre-pregnancy BMI |                  |
|                                        |                                | Females       | Males                       | Normal Weight     | Overweight/obese |
|                                        |                                |               | <b>Model I<sup>b</sup></b>  |                   |                  |
| <b>Physical activity trajectories</b>  | 0.66                           | 0.12          | 0.86                        | 0.41              | 0.38             |
| <b>Sedentary behavior trajectories</b> | 0.85                           | 0.92          | 0.47                        | 0.88              | 0.91             |
|                                        |                                |               | <b>Model II<sup>c</sup></b> |                   |                  |
| <b>Physical activity trajectories</b>  | 0.60                           | 0.11          | 0.82                        | -                 | -                |
| <b>Sedentary behavior trajectories</b> | 0.93                           | 0.88          | 0.58                        | -                 | -                |

<sup>a</sup>Wald test P-value for joint significance of all physical activity or sedentary behavior trajectories (testing if any coefficient is not equal to 0).

<sup>b</sup>Model I is adjusted for maternal age at delivery (years), race (non-Hispanic white/non-Hispanic black/Hispanic/other), parental income category (<\$20K/\$20-60K/>\$60K), nulliparity (Y/N), smoking during pregnancy (Y/N), alcohol use during pregnancy (Y/N), gestational age at delivery (weeks), and offspring sex.

<sup>c</sup>Model II is adjusted for all covariates in Model I and pre-pregnancy BMI category (underweight/normal weight/overweight/obese).



Table 7. GEE sensitivity analysis for associations of leisure time physical activity and sedentary behavior with birthweight

|                                  | Regression coefficient P value <sup>a</sup> |               |               |                   |                  |
|----------------------------------|---------------------------------------------|---------------|---------------|-------------------|------------------|
|                                  | Total                                       | Offspring Sex |               | Pre-pregnancy BMI |                  |
|                                  |                                             | Females       | Males         | Normal Weight     | Overweight/obese |
| <b>Birthweight (g)</b>           |                                             |               |               |                   |                  |
| Physical activity                | 0.34                                        | 0.50          | Not estimable | Not estimable     | 0.40             |
| Sedentary behavior               | 0.32                                        | 0.16          | 0.79          | 0.65              | 0.39             |
| <b>Small-for-gestational age</b> |                                             |               |               |                   |                  |
| Physical activity                | Not estimable                               | 0.70          | Not estimable | Not estimable     | Not estimable    |
| Sedentary behavior               | 0.87                                        | Not estimable | 0.50          | Not estimable     | 0.78             |
| <b>Large-for-gestational age</b> |                                             |               |               |                   |                  |
| Physical activity                | 0.16                                        | 0.66          | 0.22          | 0.80              | 0.09             |
| Sedentary behavior               | 0.99                                        | 0.57          | 0.71          | 0.59              | 0.44             |

<sup>a</sup>Model is adjusted for maternal age at delivery (years), race (non-Hispanic white/non-Hispanic black/Hispanic/other), parental income category (<\$20K/\$20-60K/>\$60K), nulliparity (Y/N), smoking during pregnancy (Y/N), alcohol use during pregnancy (Y/N), gestational age at delivery (weeks), and offspring sex.



Table 8. Associations of leisure time sedentary behavior trajectory groups with categorical birthweight

|                                          | N       | SGA                                            |                                                 | N        | LGA                                            |                                                 |
|------------------------------------------|---------|------------------------------------------------|-------------------------------------------------|----------|------------------------------------------------|-------------------------------------------------|
|                                          |         | Relative Risk (95% CI)<br>Model I <sup>a</sup> | Relative Risk (95% CI)<br>Model II <sup>b</sup> |          | Relative Risk (95% CI)<br>Model I <sup>a</sup> | Relative Risk (95% CI)<br>Model II <sup>b</sup> |
| <b>Sedentary behavior trajectory</b>     |         |                                                |                                                 |          |                                                |                                                 |
| <b>OVERALL</b>                           |         |                                                |                                                 |          |                                                |                                                 |
| 1 (consistently moderate SB)             | 8/85    | 0.56 (0.17, 1.84)                              | 0.54 (0.18, 1.64)                               | 8/85     | 0.59 (0.19, 1.87)                              | 0.61 (0.18, 2.00)                               |
| 2 (consistently low SB)                  | 82/1056 | 1.21 (0.53, 2.76)                              | 1.11 (0.48, 2.56)                               | 176/1056 | 1.23 (0.64, 2.39)                              | 1.33 (0.68, 2.59)                               |
| 3 (decreasing from moderate SB)          | 13/171  | Reference                                      | Reference                                       | 24/171   | Reference                                      | Reference                                       |
| 4 (increasing SB)                        | 3/33    | 1.56 (0.39, 6.29)                              | 1.40 (0.35, 5.60)                               | 4/33     | 0.75 (0.20, 2.81)                              | 0.87 (0.25, 3.06)                               |
| 5 (decreasing from high SB)              | 4/27    | 2.55 (0.50, 12.9)                              | 2.63 (0.51, 13.4)                               | 4/27     | 2.19 (0.47, 10.3)                              | 1.94 (0.43, 8.77)                               |
| <b>FEMALES</b>                           |         |                                                |                                                 |          |                                                |                                                 |
| 1 (consistently moderate SB)             | 3/41    | 0.74 (0.13, 4.09)                              | 0.47 (0.10, 2.13)                               | 4/41     | 1.12 (0.32, 3.86)                              | 1.07 (0.27, 4.18)                               |
| 2 (consistently low SB)                  | 41/512  | 1.42 (0.48, 4.18)                              | 1.04 (0.34, 3.15)                               | 83/512   | 1.96 (0.68, 5.66)                              | 2.17 (0.72, 6.53)                               |
| 3 (decreasing from moderate SB)          | 6/91    | Reference                                      | Reference                                       | 11/91    | Reference                                      | Reference                                       |
| 4 (increasing SB) <sup>c</sup>           | -       | -                                              | 1.66 (0.15, 17.9)                               | 4/17     | 2.99 (0.75, 11.9)                              | 3.47 (0.90, 13.4)                               |
| 5 (decreasing from high SB) <sup>c</sup> | -       | -                                              | 3.07 (0.24, 40.0)                               | 0/14     | Not estimated                                  | Not estimated                                   |
| <b>MALES</b>                             |         |                                                |                                                 |          |                                                |                                                 |
| 1 (consistently moderate SB)             | 5/44    | 0.41 (0.09, 2.00)                              | 0.43 (0.09, 2.07)                               | 4/44     | 0.42 (0.09, 2.00)                              | 0.46 (0.10, 2.13)                               |
| 2 (consistently low SB)                  | 41/544  | 0.99 (0.35, 2.76)                              | 1.03 (0.36, 2.93)                               | 93/544   | 0.91 (0.46, 1.83)                              | 0.96 (0.48, 1.92)                               |
| 3 (decreasing from moderate SB)          | 7/80    | Reference                                      | Reference                                       | 13/80    | Reference                                      | Reference                                       |
| 4 (increasing SB) <sup>c</sup>           | -       | -                                              | 1.53 (0.28, 8.31)                               | 0/16     | Not estimated                                  | Not estimated                                   |
| 5 (decreasing from high SB)              | 3/13    | 2.20 (0.30, 16.4)                              | 1.96 (0.26, 14.7)                               | 4/13     | 4.53 (0.72, 28.7)                              | 3.90 (0.65, 23.3)                               |

P value for interaction= Model does not converge

<sup>a</sup>Model I is adjusted for maternal age at delivery (years), race (non-Hispanic white/non-Hispanic black/Hispanic/other), parental income category (<\$20K/\$20-60K/>\$60K), nulliparity (Y/N), smoking during pregnancy (Y/N), alcohol use during pregnancy (Y/N), gestational age at delivery (weeks), and offspring sex.

<sup>b</sup>Model II is adjusted for all covariates in Model I and pre-pregnancy BMI category (underweight/normal weight/overweight/obese).

<sup>c</sup>Number of SGA in this category is too small (<3), so cannot show estimate according to Add Health rules.
